# Supplementary material for: The Relationship between Bone Health Parameters, Vitamin D and Iron Status, and Dietary Calcium Intake in Young Males
Source: MDPI journal article supplement (doi:10.3390/nu16020215), 2024-01-09
Supplement: s1 [file s1]

Table S1. Mean values  $\pm$  SD of the variables under study.

| Variable                  | Control<br>n=37  | Ski jumping<br>n=28 | Volleyball<br>n=48 |
|---------------------------|------------------|---------------------|--------------------|
| Ferritin (ng/ml))         | 67.2 $\pm$ 39.9  | 59.4 $\pm$ 40.9     | 57.7 $\pm$ 29.7    |
| Fe stores (g)             | 7.72 $\pm$ 2.3   | 7.6 $\pm$ 2.2       | 7.4 $\pm$ 2.2      |
| Total 25(OH)D (ng/ml)     | 21.0 $\pm$ 5.0   | 28.9 $\pm$ 8.1      | 28.3 $\pm$ 6.6     |
| Free 25(OH)D (ng/ml)      | 5.50 $\pm$ 1.8   | 6.7 $\pm$ 1.9       | 8.1 $\pm$ 2.4      |
| Calcium intake (mg/day)   | 1039 $\pm$ 767   | 858 $\pm$ 420       | 1410 $\pm$ 816     |
| Z-score                   | 0.11 $\pm$ 1.14  | -0.03 $\pm$ 0.97    | 1.43 $\pm$ 0.90    |
| BMAD (g/cm <sup>3</sup> ) | 0.31 $\pm$ 0.03  | 0.31 $\pm$ 0.04     | 0.33 $\pm$ 0.03    |
| TBS                       | 1.433 $\pm$ 0.08 | 1.479 $\pm$ 0.06    | 1.396 $\pm$ 0.08   |
| Fractures (number)        | 21               | 13                  | 20                 |

Fe stores – body iron stores; Total 25(OH)D – total fraction of 25(OH)D, Free 25(OH)D – free fraction of 25(OH)D; BMAD – lumbar spine bone mineral apparent density; TBS – trabecular bone score.

Table S2. Results of one-way analysis of variance and non-parametric tests for groups studied

| Control vs. Ski jumping vs. Volleyball |          |                                                                                    |
|----------------------------------------|----------|------------------------------------------------------------------------------------|
| Variable                               | <i>p</i> | ES                                                                                 |
| Ferritin                               | NS       |                                                                                    |
| Fe stores                              | NS       |                                                                                    |
| Total 25(OH)D                          | ***      | $\epsilon^2 = 0.285$ ; CI<0.161;0.434><br>(C vs. S_J)***; (C vs. V)***             |
| Free 25(OH)D                           | ***      | $\epsilon^2 = 0.257$ ; CI<0.133;0.413><br>(C vs. S_J)*; (C vs. V)***; (S_J vs. V)* |
| Calcium intake                         | ***      | $\epsilon^2 = 0.087$ ; CI<0.019;0.222><br>(C vs. V)*; (S_J vs. V)*                 |
| Z-score                                | ***      | $\eta^2 = 0.323$ ; CI<0.219;0.405><br>(C vs. V)***; (S_J vs. V)***                 |
| BMAD                                   | *        | $\eta^2 = 0.063$ ; CI<0.009;0.123><br>(C vs. V)*                                   |
| TBS                                    | ***      | $\eta^2 = 0.161$ ; CI<0.063;0.249><br>(C vs. S_J)*; (S_J vs. V)***                 |
| Fractures                              | NS       |                                                                                    |

Fe stores – body iron stores; Total VitD – total fraction of 25(OH)D, Free 25(OH)D – free fraction of 25(OH)D; BMAD – lumbar spine bone mineral apparent density; TBS – trabecular bone score.

C stands for Control, S\_J for Ski jumping, V for Volleyball, CI – confidence interval. Significant differences: \*  $p < 0.05$ ; \*\*\*  $p < 0.001$ ; NS - not significant.

#Effect sizes (ES) epsilon squared ( $\epsilon^2$ ) were taken as small for  $0.01 \leq \epsilon^2 < 0.08$ , medium  $0.08 \leq \epsilon^2 < 0.26$ , large  $\epsilon^2 \geq 0.26$  and for eta squared ( $\eta^2$ ) as small  $0.01 \leq \eta^2 < 0.06$ , medium  $0.06 \leq \eta^2 < 0.14$  and large  $\eta^2 \geq 0.14$  [35,36].
